# Supplementary material for: Plasmonic and sensing properties of vertically oriented hexagonal gold nanoplates
Source: Royal Society of Chemistry journal article supplement (doi:10.1039/c8nr04463e), 2018-01-01
Supplement: c8nr04463e1.pdf [file c8nr04463e1.pdf]

## Electronic Supplementary Information

### **Plasmonic and sensing properties of vertically oriented hexagonal gold nanoplates**

Hang Yin,<sup>a,b</sup> Yanzhen Guo,<sup>a</sup> Ximin Cui,<sup>a</sup> Wenzheng Lu,<sup>a</sup> Zhi Yang,<sup>c</sup> Baocheng Yang<sup>b</sup> and Jianfang Wang<sup>\*a</sup>

*<sup>a</sup>Department of Physics, The Chinese University of Hong Kong, Shatin, Hong Kong SAR, China.*

*E-mail: jfwang@phy.cuhk.edu.hk*

*<sup>b</sup>Henan Provincial Key Laboratory of Nanocomposites and Applications, Huanghe Science and Technology College, Zhengzhou 450006, China*

*<sup>c</sup>Key Laboratory for Thin Film and Microfabrication of Ministry of Education, Department of Micro/Nano Electronics, School of Electronic Information and Electrical Engineering, Shanghai Jiao Tong University, Shanghai 200240, China*

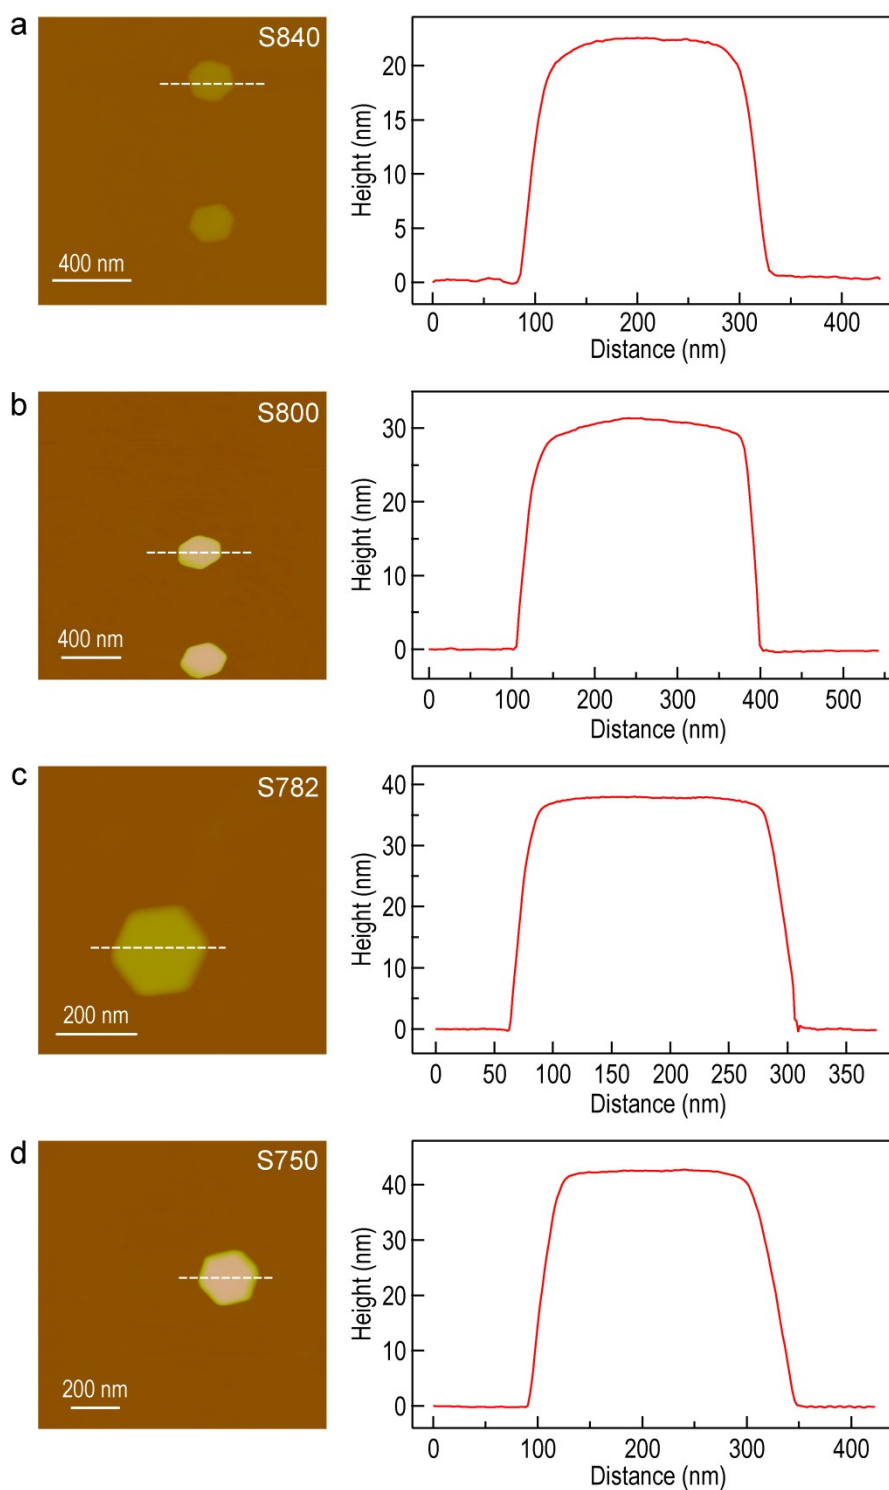

**Fig. S1** AFM characterization of the Au NPLs. The AFM images and height profiles of the Au NPLs are shown in the left and right columns, respectively. The height profiles are extracted along the dashed lines indicated in the corresponding AFM images. (a) S840 sample. (b) S800 sample. (c) S782 sample. (d) S750 sample.

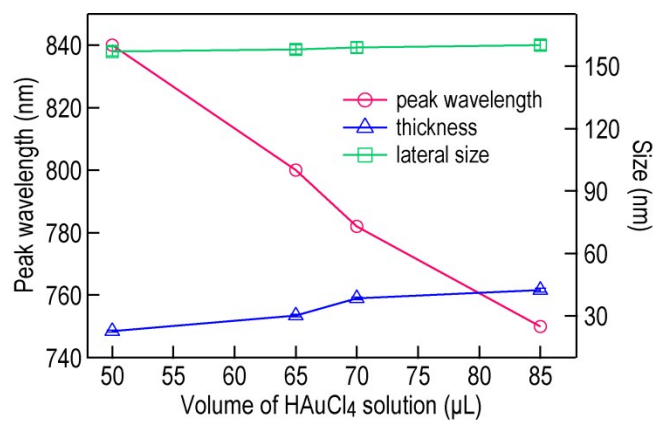

**Fig. S2** Sizes and major plasmon peak wavelengths of the Au NPL samples. The major plasmon peak wavelength (left axis), the lateral size and thickness (right axis) are plotted as functions of the volume of the HAuCl<sub>4</sub> solution added during the growth of the Au NPL samples. The height of each error bar represents one standard deviation.

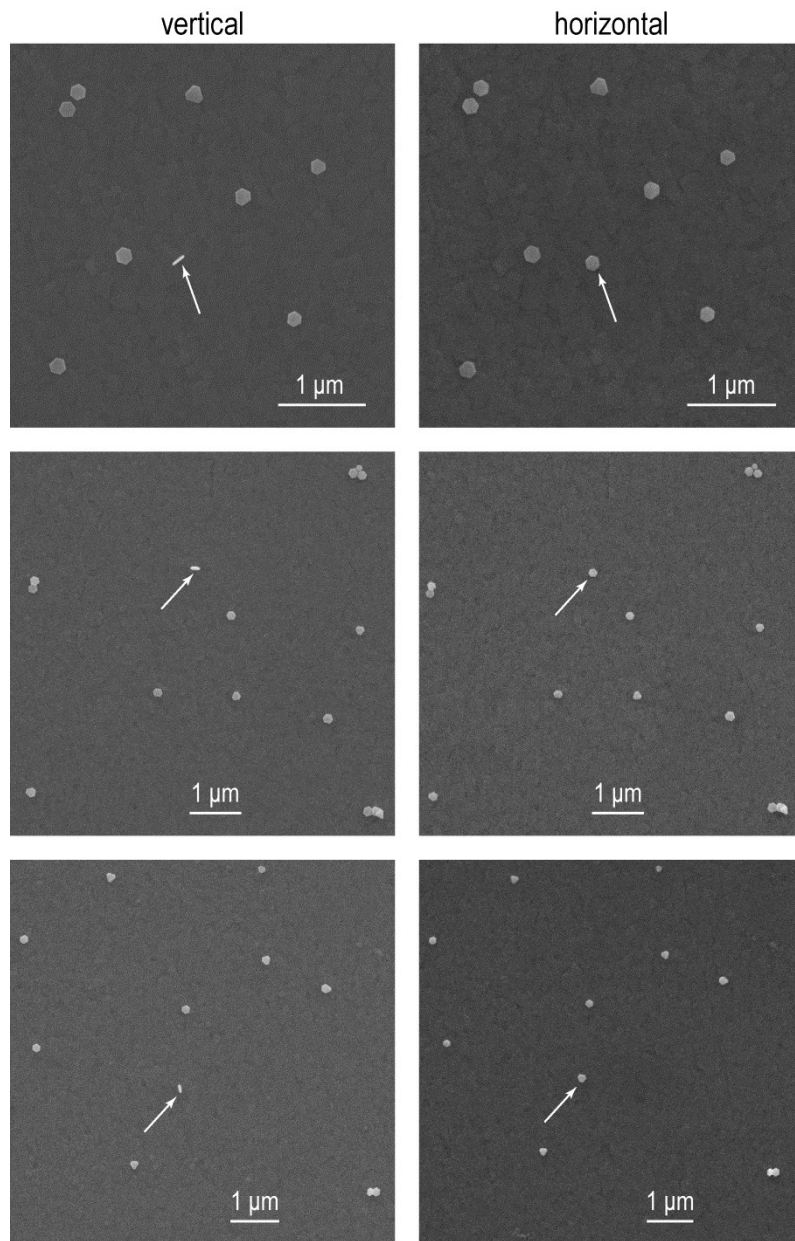

**Fig. S3** Knocking-down of the vertical Au NPLs. The SEM images of the Au NPLs before and after being knocked down are shown in the left and right columns, respectively. The targeted Au NPLs are marked by the white arrows. Both of the SEM images in each pair were taken in the same region on the ITO substrates.

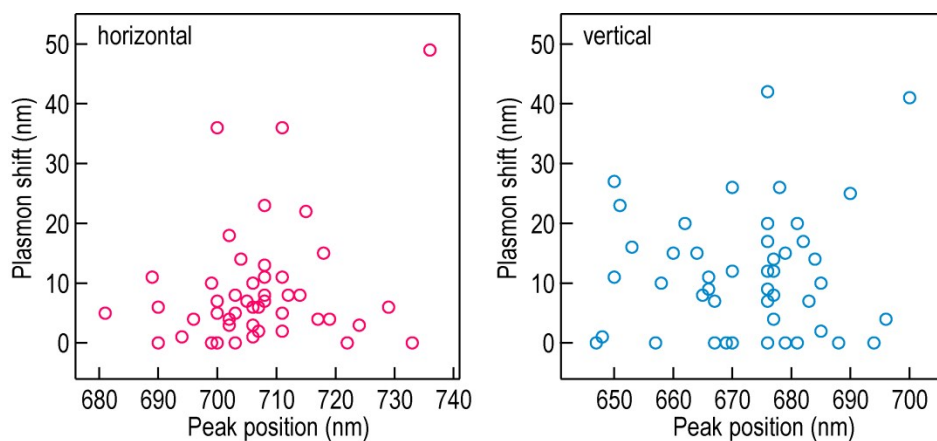

**Fig. S4** Plasmon shifts of the S750 Au NPLs upon the binding of HS-PEG. The distributions of the plasmon shifts of the horizontally and vertically oriented Au NPLs are shown in the left and right plots, respectively.

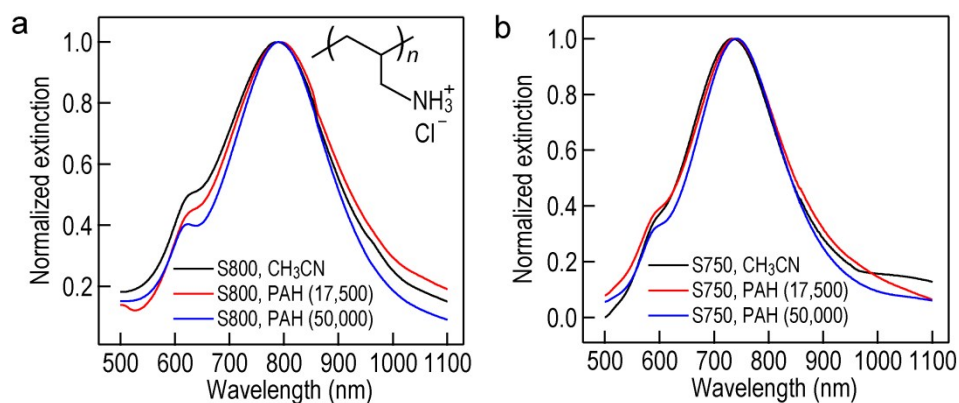

**Fig. S5** Extinction spectra of the Au NPLs encapsulated with PAH. (a) Extinction spectra of the S800 Au NPLs that are adsorbed with cyanide ions (black), encapsulated with the small PAH chains (red) and encapsulated with the large PAH chains (blue), respectively. The inset shows the molecular structure of PAH. (b) Extinction spectra measured on the S750 Au NPL samples that were treated similarly.

**Table S1** Plasmon peak wavelengths of the S800 Au NPLs before and after the adsorption of PAH with the molecular weight of 17500

| S800-PAH (MW: 17500)          | Number | Before (nm) | After (nm) | Shift (nm) | Mean shift (nm) |
|-------------------------------|--------|-------------|------------|------------|-----------------|
| Vertically oriented Au NPLs   | 1      | 729         | 818        | 89         | 133 ± 13        |
|                               | 2      | 752         | 872        | 120        |                 |
|                               | 3      | 694         | 848        | 154        |                 |
|                               | 4      | 719         | 853        | 134        |                 |
|                               | 5      | 697         | 851        | 154        |                 |
|                               | 6      | 717         | 851        | 134        |                 |
|                               | 7      | 717         | 843        | 140        |                 |
|                               | 8      | 715         | 854        | 139        |                 |
|                               | 9      | 685         | 820        | 135        |                 |
| Horizontally oriented Au NPLs | 1      | 742         | 812        | 70         | 72 ± 21         |
|                               | 2      | 748         | 823        | 75         |                 |
|                               | 3      | 708         | 789        | 81         |                 |
|                               | 4      | 717         | 748        | 31         |                 |
|                               | 5      | 748         | 829        | 81         |                 |
|                               | 6      | 760         | 847        | 87         |                 |
|                               | 7      | 749         | 809        | 60         |                 |
|                               | 8      | 713         | 802        | 89         |                 |
|                               | 9      | 725         | 826        | 101        |                 |
|                               | 10     | 685         | 734        | 49         |                 |

**Table S2** Plasmon peak wavelengths of the S800 Au NPLs before and after the adsorption of PAH with the molecular weight of 50000

| S800-PAH (MW: 50000)          | Number | Before (nm) | After (nm) | Shift (nm) | Mean shift (nm) |
|-------------------------------|--------|-------------|------------|------------|-----------------|
| Vertically oriented Au NPLs   | 1      | 700         | 803        | 103        | $132 \pm 16$    |
|                               | 2      | 731         | 850        | 119        |                 |
|                               | 3      | 714         | 874        | 160        |                 |
|                               | 4      | 688         | 822        | 134        |                 |
|                               | 5      | 677         | 821        | 144        |                 |
|                               | 6      | 718         | 859        | 141        |                 |
|                               | 7      | 686         | 841        | 155        |                 |
|                               | 8      | 679         | 794        | 115        |                 |
|                               | 9      | 685         | 823        | 138        |                 |
|                               | 10     | 714         | 821        | 107        |                 |
| Horizontally oriented Au NPLs | 1      | 781         | 849        | 68         | $87 \pm 17$     |
|                               | 2      | 780         | 857        | 77         |                 |
|                               | 3      | 724         | 815        | 91         |                 |
|                               | 4      | 750         | 837        | 87         |                 |
|                               | 5      | 695         | 791        | 96         |                 |
|                               | 6      | 791         | 850        | 59         |                 |
|                               | 7      | 747         | 839        | 92         |                 |
|                               | 8      | 797         | 855        | 58         |                 |

**Table S3** Plasmon peak wavelengths of the S750 Au NPLs before and after the adsorption of PAH with the molecular weight of 17500

| S750-PAH (MW: 17500)          | Number | Before (nm) | After (nm) | Shift (nm) | Mean shift (nm) |
|-------------------------------|--------|-------------|------------|------------|-----------------|
| Vertically oriented Au NPLs   | 1      | 687         | 764        | 77         | $104 \pm 20$    |
|                               | 2      | 656         | 792        | 136        |                 |
|                               | 3      | 644         | 735        | 91         |                 |
|                               | 4      | 680         | 784        | 104        |                 |
|                               | 5      | 657         | 777        | 120        |                 |
|                               | 6      | 672         | 780        | 108        |                 |
|                               | 7      | 653         | 742        | 89         |                 |
|                               | 8      | 652         | 739        | 87         |                 |
|                               | 9      | 665         | 751        | 86         |                 |
|                               | 10     | 670         | 793        | 123        |                 |
|                               | 11     | 649         | 778        | 129        |                 |
| Horizontally oriented Au NPLs | 1      | 668         | 717        | 49         | $53 \pm 7$      |
|                               | 2      | 689         | 738        | 49         |                 |
|                               | 3      | 713         | 763        | 50         |                 |
|                               | 4      | 685         | 732        | 47         |                 |
|                               | 5      | 695         | 738        | 43         |                 |
|                               | 6      | 700         | 767        | 67         |                 |
|                               | 7      | 701         | 766        | 65         |                 |
|                               | 8      | 712         | 770        | 58         |                 |
|                               | 9      | 669         | 721        | 52         |                 |
|                               | 10     | 717         | 764        | 47         |                 |
|                               | 11     | 703         | 762        | 59         |                 |



**Table S4** Plasmon peak wavelengths of the S750 Au NPLs before and after the adsorption of PAH with the molecular weight of 50000

| S750-PAH (MW: 50000)          | Number | Before (nm) | After (nm) | Shift (nm) | Mean shift (nm) |
|-------------------------------|--------|-------------|------------|------------|-----------------|
| Vertically oriented Au NPLs   | 1      | 687         | 761        | 74         | 115 ± 32        |
|                               | 2      | 655         | 813        | 158        |                 |
|                               | 3      | 659         | 815        | 156        |                 |
|                               | 4      | 651         | 769        | 118        |                 |
|                               | 5      | 658         | 749        | 91         |                 |
|                               | 6      | 678         | 791        | 113        |                 |
|                               | 7      | 646         | 740        | 94         |                 |
|                               | 8      | 677         | 763        | 86         |                 |
|                               | 9      | 687         | 839        | 152        |                 |
| Horizontally oriented Au NPLs | 1      | 685         | 777        | 92         | 81 ± 15         |
|                               | 2      | 711         | 814        | 103        |                 |
|                               | 3      | 703         | 790        | 87         |                 |
|                               | 4      | 675         | 750        | 75         |                 |
|                               | 5      | 706         | 807        | 101        |                 |
|                               | 6      | 696         | 797        | 101        |                 |
|                               | 7      | 707         | 774        | 67         |                 |
|                               | 8      | 715         | 804        | 89         |                 |
|                               | 9      | 699         | 758        | 59         |                 |
|                               | 10     | 708         | 764        | 56         |                 |
|                               | 11     | 716         | 784        | 68         |                 |
